## RESEARCH ARTICLE

# ArHsp40 and ArHsp40-2 contribute to stress tolerance and longevity in *Artemia franciscana*, but only ArHsp40 influences diapause entry

Nathan M. Rowarth and Thomas H. MacRae\*

## ABSTRACT

Embryos of the crustacean *Artemia franciscana* develop either ovoviviparously or oviparously, yielding swimming larvae (nauplii) or encysted gastrulae (cysts), respectively. Nauplii moult several times and become adults whereas cysts enter diapause, a state of dormancy characterized by exceptionally low metabolism and high stress tolerance. Synthesis of molecular chaperones such as the J-domain proteins ArHsp40 and ArHsp40-2 occurs during embryo development and post-diapause growth of *A. franciscana* and they influence development and stress tolerance. To further investigate J-domain protein function, ArHsp40 and ArHsp40-2 were each knocked down by RNA interference. Reductions in ArHsp40 and ArHsp40-2 had no effect on adult survival, time to release of cysts and nauplii from females and first-brood size. However, knockdown of both *A. franciscana* J-domain proteins reduced the longevity and heat tolerance of nauplii, with the loss of ArHsp40 having a greater effect. The knockdown of ArHsp40, but not of ArHsp40-2, caused approximately 50% of cysts to abort diapause entry and hatch without exposure to an exogenous signal such as low temperature and/or desiccation. Cysts lacking ArHsp40 that entered diapause exhibited decreased stress tolerance as did cysts with reduced ArHsp40-2, the latter to a lesser degree. The longevity of nauplii hatching prematurely from cysts was less than for nauplii arising by other means. The results expand our understanding of Hsp40 function in *A. franciscana* stress tolerance and development, especially during diapause, and they provide the first example of a molecular chaperone that influences diapause entry.

**KEY WORDS:** Hsp40, J-domain proteins, Dormancy, Gene expression, RNA interference

## INTRODUCTION

Diapause, a phylogenetically widespread state of dormancy wherein animals gain the ability to cope with unfavourable environmental conditions, is characterized by the arrest of development, reduced metabolism and enhanced stress tolerance, these varying in intensity across species and life history stages (Denlinger, 2002; Košťál, 2006; Hahn and Denlinger, 2007; Denlinger and Armbruster, 2014; King and MacRae, 2015). Diapause is divided into phases termed initiation, maintenance and termination, which may be further subdivided (Košťál, 2006; Yocum et al., 2009; Košťál et al., 2017). Diapause initiation can entail diet change, differential gene

expression and protein synthesis, structural changes for tissue defence, and lipid accumulation (Hayward et al., 2005; Hahn and Denlinger, 2007; MacRae, 2010; Clark et al., 2012; Tarrant et al., 2014, 2016; Romney and Podrabsky, 2017; Arezo et al., 2017). Initiation leads to maintenance where, most notably, stress tolerance and metabolic depression are maximized. Diapause termination occurs in response to environmental cues such as desiccation and temperature, and to chemical agents such as hydrogen peroxide (Tachibana and Numata, 2004; Robbins et al., 2010; Terao et al., 2012). Although generally restricted to a single life history stage in each species, diapause occurs in embryos, larvae, pupae and adults of crustaceans and insects (King and MacRae, 2015).

The extremophile crustacean *Artemia franciscana* survives inhospitable habitats because it undertakes diapause as part of its life history, which may follow one of two distinct developmental pathways. During ovoviviparous development, fertilized eggs of *A. franciscana* develop into nauplii in the female's brood sac and swimming larvae are released approximately 5 days post-fertilization (Liang and MacRae, 1999; MacRae, 2003). In contrast, oviparous development, also of about 5 days duration, yields embryos arrested as gastrulae and encased by a chitinous shell (Ma et al., 2013; MacRae, 2016). The encysted embryos, termed cysts, are released from females and experience severe metabolic depression as they enter diapause (Clegg et al., 1996; Clegg, 1997; Hand et al., 2013). Diapausing *A. franciscana* cysts are unusually stress tolerant, resisting temperature extremes (Clegg, 2005; King and MacRae, 2012), ultraviolet radiation (UV) (Liu et al., 2009; MacRae, 2010, 2016; Dai et al., 2011), anoxia (Clegg, 1997; Clegg et al., 2000) and desiccation (Clegg, 2005; Toxopeus et al., 2014; Janis et al., 2017). Upon diapause termination, growth of embryos resumes and swimming larvae emerge from cysts to develop into adults.

Survival of *A. franciscana* cysts depends on several structural and molecular adaptations including the presence of molecular chaperones (MacRae, 2016), of which the ATP-independent small heat shock proteins (sHsps) have received the most attention (Jackson and Clegg, 1996; Liang and MacRae, 1999; Liang et al., 1997a,b; King and MacRae, 2012; King et al., 2013). ATP-dependent molecular chaperones have also been examined in *A. franciscana* and these include Hsp70 (Clegg, 2011; Iryani et al., 2017), a major heat shock protein (Hsp) responsible for the folding of nascent proteins, promoting the assembly of protein complexes and either salvaging or destroying aberrant proteins (Mayer and Bukau, 2005; Zuideweg et al., 2017; Żwirowski et al., 2017; Mayer, 2018). These activities depend on conformational changes in Hsp70 modulated by its ATPase activity and this is influenced by co-chaperones such as the J-domain proteins or Hsp40s (Mayer and Bukau, 2005; Craig and Marszałek, 2017; Bascos et al., 2017; Kityk et al., 2018). The J-domain proteins, characterized by a

Department of Biology, Dalhousie University, Halifax, NS, B3H 4R2 Canada.

\*Author for correspondence (tmacrae@dal.ca)

 T.H.M., 0000-0002-5334-8030

Received 20 July 2018; Accepted 23 August 2018

J-domain possessing a highly conserved histidine–proline–aspartic acid (HPD) motif, are divided into three main groups termed types 1, 2 and 3 or A, B and C (Craig and Marszalek, 2017). J-domain proteins deliver substrate to Hsp70, stimulate Hsp70 ATPase activity and function in the Hsp70–Hsp40–Hsp110 protein disaggregation system, resulting in either the refolding or destruction of proteins (Nillegoda et al., 2015, 2017, 2018; Kityk et al., 2018).

Two J-domain proteins have been identified in *A. franciscana*, namely the type 1 ArHsp40 and the type 2 ArHsp40-2 (Jiang et al., 2016; Rowarth and MacRae, 2018). These J-domain proteins are induced by heat shock in nauplii, indicating a role in stress tolerance, and both are developmentally regulated during post-diapause development of *A. franciscana*; however, their patterns of synthesis vary, suggesting different functions. To further investigate J-domain proteins in *A. franciscana*, ArHsp40 and ArHsp40-2 were separately knocked down in nauplii and cysts by RNA interference (RNAi). Injection with double-stranded RNA (dsRNA) for either ArHsp40 or ArHsp40-2 had no apparent effect on mature females. However, nauplii lacking either J-domain protein exhibited reduced longevity and stress tolerance. Diapausing cysts with reduced amounts of J-domain proteins also had lower stress tolerance and as for nauplii, the loss of ArHsp40 had a greater effect than reduction of ArHsp40-2. The knockdown of ArHsp40, but not ArHsp40-2, caused about 50% of cysts to abort diapause entry, to our knowledge the first time the loss of a molecular chaperone has been shown to have this effect.

## MATERIALS AND METHODS

### Culture of *A. franciscana*

*Artemia franciscana* Kellogg 1906 cysts from the Great Salt Lake (INVE Aquaculture Inc., Ogden, UT, USA), hydrated for at least 3 h on ice in distilled H<sub>2</sub>O and collected by suction filtration, were incubated at room temperature in 1 µm-filtered, UV-treated and autoclaved 33.0 ppt saltwater from Halifax Harbour, NS, Canada, hereafter termed seawater. Animals incubated in seawater at room temperature were fed daily with *Isochrysis galbana* from the Provasoli-Guillard National Center for Culture of Marine Phytoplankton, West Boothbay Harbor, ME, USA. The research described in this paper was performed in accordance with the ethical guidelines provided by the Canadian Council on Animal Care (CCAC). The University Committee on Laboratory Animals (UCLA) of Dalhousie University approved the research and assigned protocol number 117-36.

### Injection of *A. franciscana* females with dsRNA

To prepare dsRNA, Invitrogen™ Platinum *Taq* DNA Polymerase (Fisher Scientific, Ottawa, ON, Canada) and primers (Integrated DNA Technologies, Coralville, IA, USA) containing the T7 promoter (Table 1) were used to amplify *ArHsp40-1* (Jiang et al., 2016) and *ArHsp40-2* (Rowarth and MacRae, 2018) cDNAs by PCR. Green fluorescent protein (*GFP*) cDNA was amplified from the vector pEGFP-N1 (Clontech, Mountain View, CA, USA) (King and MacRae, 2012). The cDNAs were used as template for the generation of *ArHsp40*, *ArHsp40-2* and *GFP* dsRNA with the MEGAscript® RNAi kit (Ambion Applied Biosystems, Austin, TX, USA) following the manufacturer's instructions. cDNA and dsRNA concentrations were determined at 260 nm and they were resolved in 1.0% agarose gels and stained with Invitrogen SYBR Safe™ gel stain (Fisher Scientific) prior to visualization in a MF-Chemi-BIS 3.2 gel documentation system (Montreal Biotech, Montreal, QC, Canada).

**Table 1. Primers used for the synthesis of dsRNA and for qPCR**

| Primer                         | Sequence (5'–3')                                        | T <sub>m</sub> (°C) |
|--------------------------------|---------------------------------------------------------|---------------------|
| <b>dsRNA template</b>          |                                                         |                     |
| ArHsp40 forward                | <b>TAATACGACTCACTATAGGGA</b><br>GTGCATCAGTTGAGCGTCAC    | 54.0                |
| ArHsp40 reverse                | <b>TAATACGACTCACTATAGGGA</b><br>TCCGGGGTCCCAGTACTTC     | 54.0                |
| ArHsp40-2 forward              | <b>TAATACGACTCACTATAGGGA</b><br>GTGGTTCTCCAGTTTTGGGG    | 54.0                |
| ArHsp40-2 reverse              | <b>TAATACGACTCACTATAGGGA</b><br>ACCACGTCGGTGGGATTTTA    | 54.0                |
| GFP forward <sup>a</sup>       | <b>TAATACGACTCACTATAGGGA</b><br>GACACATGAAGCAGCAGACTT   | 53.5                |
| GFP reverse <sup>a</sup>       | <b>TAATACGACTCACTATAGGGA</b><br>GAAGTTCACCTTGATGCCGTTTC | 53.5                |
| <b>qPCR</b>                    |                                                         |                     |
| ArHsp40 forward                | GTGCATCAGTTGAGCGTCAC                                    | 54.0                |
| ArHsp40 reverse                | TGCTGAACAATCCAGGAGC                                     | 54.0                |
| ArHsp40-2 forward              | TGACCCATTCGGTGGGTTTG                                    | 54.0                |
| ArHsp40-2 reverse              | TCGTGTTCAATGGGTGGGTC                                    | 54.0                |
| α-tubulin forward <sup>b</sup> | CGACCATAAAAAGCGCAGTCA                                   | 49.0                |
| α-tubulin reverse <sup>b</sup> | CTACCCAGCACCACAGGTCTCT                                  | 49.0                |

Bold sequences, T7 promoter; <sup>a</sup>Zhao et al. (2012); <sup>b</sup>King et al. (2013).

Mature females carrying diapause- or nauplius-destined unfertilized eggs were selected from populations of animals maintained in seawater and injected in the egg sac with *ArHsp40*, *ArHsp40-2* or *GFP* dsRNA, each of which was diluted to 0.7 ng nl<sup>-1</sup> with 0.5% Phenol Red in Dulbecco's phosphate-buffered saline (DPBS) (King and MacRae, 2012). Injections were performed under an Olympus SZ61 stereomicroscope (Olympus Canada, Inc., Markham, ON, Canada) with a borosilicate micropipette pulled with a custom programmed P-97 Flaming/Brown Micropipette Puller (Sutter Instrument Co., Novato, CA, USA) and broken at 45 deg using a clean razor blade. Each female was placed on 5% agar and lightly blotted with a Kimwipe (Sigma-Aldrich, Oakville, ON, Canada) prior to injection with 175 ng of dsRNA in approximately 250 nl using a Nanoject II Microinjector (Drummond Scientific, Co., Broomall, PA, USA). Injected females were returned to seawater and observed for 3 h to ensure retention of Phenol Red, and thus dsRNA, and maintenance of normal behavioural characteristics (King and MacRae, 2012). Each female was mated with a male 24 h post-injection in a 6-well culture plate containing seawater. Animals were fed daily with *I. galbana*.

### Knockdown of ArHsp40 and ArHsp40-2 in *A. franciscana* cysts and nauplii

To prepare RNA, 30–50 *A. franciscana* cysts were collected 10 days post-release from females injected with *ArHsp40-1*, *ArHsp40-2* or *GFP* dsRNA. Similar numbers of nauplii were collected immediately after release from females. RNA was extracted from cysts and nauplii by homogenizing flash-frozen animals in 100 µl TRIzol® (Invitrogen) and cDNA was synthesized as described above. qPCR was performed in a Rotor-Gene RG-3000 system (Corbett Research, Sydney, NSW, Australia) using 0.5 µl cDNA as template (King and MacRae, 2012; King et al., 2013) and 0.4 mmol l<sup>-1</sup> primers for ArHsp40, ArHsp40-2 and α-tubulin (Integrated DNA Technologies; Table 1) under the following conditions: 5 min at 94°C, 35 cycles of 30 s at 94°C, 30 s at 54°C for ArHsp40 and ArHsp40-2 and 49°C for α-tubulin and 1 min at 72°C, followed by 10 min at 72°C. qPCR was conducted with a QuantiFast® SYBER® Green PCR Kit (Qiagen, Mississauga, ON, Canada). The experiment was performed in triplicate using

three different preparations of cysts and nauplii and each preparation was analysed in duplicate. cDNA copy numbers for ArHsp40 and ArHsp40-2 were determined from a standard curve of Ct values ( $R^2 > 0.99$ ), and normalized against  $\alpha$ -tubulin (King et al., 2013).

To prepare protein extracts for western blotting, 30–50 cysts and nauplii were flash frozen and homogenized in 30  $\mu$ l of 4 $\times$  treatment buffer [250 mmol l<sup>-1</sup> Tris, 280 mmol l<sup>-1</sup> SDS, 40% (v/v) glycerol, 20% (v/v)  $\beta$ -mercaptoethanol, 0.2% (w/v) Bromophenol Blue, pH 6.8], placed in a boiling water bath for 5 min and then centrifuged at 4°C for 10 min at 10,000 g. Proteins were resolved in 12.5% SDS polyacrylamide gels, transferred to 0.2  $\mu$ m nitrocellulose membranes (Bio-Rad, Mississauga, ON, Canada) overnight at 100 mA and blocked for 1 h at room temperature in 5% (w/v) Carnation low-fat milk powder in TBS (10 mmol l<sup>-1</sup> Tris, 140 mmol l<sup>-1</sup> NaCl, pH 7.4). Membranes were then probed with the antibodies Anti40-type 1 (Jiang et al., 2016), Anti40-type 2 (Rowarth and MacRae, 2018) or Anti-Y (Xiang and MacRae, 1995), each diluted 1:1000 in TBS for 15 min followed by washing in TBS-T (10 mmol l<sup>-1</sup> Tris, 140 mmol l<sup>-1</sup> NaCl, 0.1% Tween-20, pH 7.4) for 1, 2, 3 and 4 min. Subsequent to washing, membranes were probed for 20 min with HRP-conjugated goat anti-rabbit IgG antibody (Sigma-Aldrich) diluted 1:10,000 in TBS and washed as before in TBS-T followed by TBS for 3 min. Immunoreactive proteins were visualized with Clarity™ ECL blotting substrate (Bio-Rad) in a MF-Chemi-BIS 3.2 gel documentation system (DNR Bio-Imaging Systems).

#### Female viability and embryo development after ArHsp40 and ArHsp40-2 knockdown

Females surviving successive brood releases after injection with *ArHsp40*, *ArHsp40-2* or *GFP* dsRNA and incubation at room temperature in seawater were counted. The number of either cysts or nauplii produced by a female after fertilization, known as the brood size, was recorded for the first release. The time from fertilization, marked by the fusion of egg sacs, until the release of cysts or nauplii was monitored at room temperature. The experiment involved 125 females of which 51 produced nauplii and 74 produced cysts.

#### Abortion of diapause entry by *A. franciscana* cysts deficient in ArHsp40

Cysts collected immediately after release from adult females injected with *ArHsp40*, *ArHsp40-2* or *GFP* dsRNA were incubated at room temperature in seawater for 10 days. Emerging cysts and nauplii were counted at daily intervals. The experiment was performed 6 times with the number of animals per trial ranging from 36 to 72.

#### Stress tolerance of *A. franciscana* cysts and nauplii deficient in ArHsp40 and ArHsp40-2

Cysts that did not abort diapause entry were collected by centrifugation at 5000 g for 1 min at room temperature, 10 days after release from females injected with *ArHsp40*, *ArHsp40-2* or *GFP* dsRNA. Seawater was removed and cysts were blotted dry prior to incubation for 4 weeks at room temperature in a desiccator containing Drierite (Sigma-Aldrich) and freezing at -20°C for 12 weeks. Cysts were then incubated in seawater at room temperature and the number of hatched nauplii, the measure of viability, was counted. Cysts were monitored for an additional 5 days after the appearance of the last nauplius to ensure no further hatching occurred. Experiments were performed in triplicate with the number of animals per trial ranging from 18 to 83.

To test heat tolerance, first-brood nauplii collected immediately after release from females injected with *ArHsp40*, *ArHsp40-2* or *GFP* dsRNA were incubated in 20 ml seawater in Corex tubes at 39°C for 1 h in a programmable water bath (VWR International LLC, Mississauga, ON, Canada). Heat shock was followed by recovery in seawater at room temperature for 24 h before swimming nauplii were counted. The experiment was performed in triplicate with the number of animals per trial ranging from 26 to 95.

#### Longevity of *A. franciscana* nauplii deficient in ArHsp40 and ArHsp40-2

Nauplii from females injected with *ArHsp40*, *ArHsp40-2* or *GFP* dsRNA were collected immediately after release as were nauplii prematurely hatched from cysts released by females injected with *ArHsp40* dsRNA. The nauplii, incubated at room temperature in seawater, were fed daily with *I. galbana*. The number of surviving animals was recorded daily until 100% mortality was reached. The experiment was performed in triplicate with the number of animals per trial ranging from 35 to 113.

#### Image processing and analysis

Images of animals captured with a Nikon AZ100 microscope were prepared for publication using Photoshop (Adobe Creative Cloud, Adobe Systems Inc.). Immunoreactive proteins on western blots were quantified with Image Studio software (Li-Core Biosciences, Lincoln, NE, USA), and band intensities for ArHsp40 and ArHsp40-2 were compared with band intensities for tyrosinated  $\alpha$ -tubulin at each development stage examined.

#### Statistical analysis

One-way ANOVA followed by Dunnett's test was carried out to detect significant differences between means and control means. All data are plotted as means  $\pm$  s.e.m. Analyses were carried out using GraphPad Prism 5 software (GraphPad Software Inc., La Jolla, CA, USA).

## RESULTS

#### Injection of *A. franciscana* females with dsRNA

dsRNA was synthesized from *ArHsp40*, *ArHsp40-2* and *GFP* cDNA. *ArHsp40* dsRNA was complementary to 324 bp (26.7%) of the full-length *ArHsp40* mRNA and targeted the zinc-binding domain (ZBD), which is lacking in *ArHsp40-2*. *ArHsp40-2* dsRNA was complementary to 327 bp (30.7%) of the full-length *ArHsp40-2* mRNA and targeted parts of the glycine/phenylalanine (G/F)-rich region and the substrate-binding region. *GFP* dsRNA is not complementary to any mRNA in the *A. franciscana* transcriptome (Zhao et al., 2012). Females destined to produce nauplii possessed green oocytes within two separated egg sacs (Fig. 1A–C) whereas females fated to produce diapause-destined embryos possessed a shell gland (Liang and MacRae, 1999). The injected dsRNA, as shown by red staining (Fig. 1D), circulated throughout the entire body. Females that exhibited normal swimming and feeding 1 day post-injection were paired with a male for fertilization.

#### Injection of *A. franciscana* adult females with ArHsp40 and ArHsp40-2 dsRNA affects neither survival nor embryo development

Survival of adult *A. franciscana* females injected with *ArHsp40*, *ArHsp40-2* or *GFP* dsRNA was similar (Fig. 2A). Regardless of the dsRNA that they received, approximately 57% of females survived and released a brood of cysts or nauplii, 15% released a second brood and 5% a third brood. Post-fertilization release time for females injected with *ArHsp40*, *ArHsp40-2* or *GFP* dsRNA for

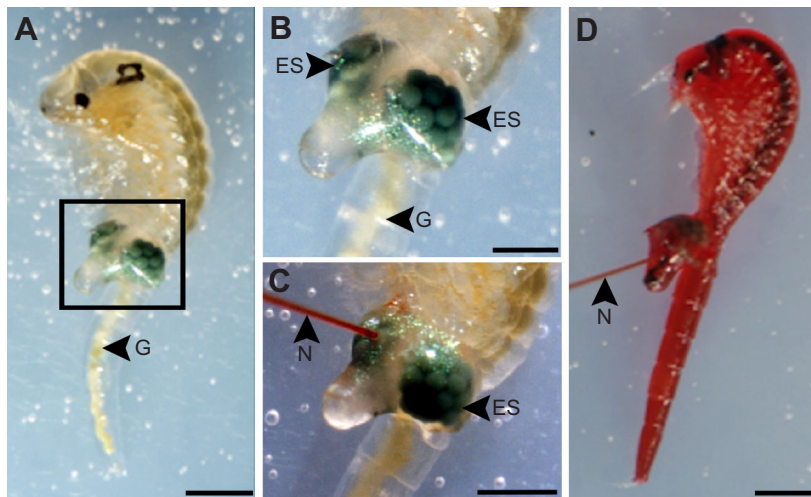

**Fig. 1. Injection of *Artemia franciscana* females with double-stranded (ds)RNA.** (A) Light micrograph of an adult *A. franciscana* female with egg sacs containing oocytes (in green). (B) Enlargement of the boxed region in A, showing egg sacs with unfertilized nauplius-destined oocytes. (C) Injection of an egg sac. (D) A female stained with Phenol Red. G, gut; ES, egg sac; N, needle. Scale bars in A and D: 1 mm; B and C: 0.5 mm.

first-brood cysts and nauplii was 5.0 days (Fig. 2B) and equal numbers of cysts and nauplii were released regardless of the dsRNA injected (Fig. 2C).

#### **ArHsp40 and ArHsp40-2 knockdown by RNAi in *A. franciscana* cysts and nauplii**

*ArHsp40* mRNA in first-brood cysts released from females injected with *ArHsp40* dsRNA was reduced approximately 86% compared with levels in cysts from females injected with either *ArHsp40-2* or *GFP* dsRNA (Fig. 3A). A lightly staining band of ArHsp40 was visible on western blots containing protein extracts of cysts released by females injected with *ArHsp40* dsRNA but a much stronger band was visible in extracts of cysts from females injected with either *ArHsp40-2* or *GFP* dsRNA (Fig. 3B). Scanning of western blots indicated that ArHsp40 was reduced approximately 86% compared with levels in cysts from females injected with *ArHsp40-2* or *GFP* dsRNA (Fig. 3C). *ArHsp40-2* mRNA in first-brood cysts released from females injected with *ArHsp40-2* dsRNA was reduced approximately 89% compared with levels in cysts from females injected with either *ArHsp40* or *GFP* dsRNA (Fig. 3A). ArHsp40-2 in first-brood cysts released from females injected with *ArHsp40-2* dsRNA was lightly stained on western blots and scanning indicated that ArHsp40-2 was reduced approximately 73% compared with levels in cysts from females injected with either *ArHsp40* or *GFP* dsRNA (Fig. 3B,C). Similar knockdowns were observed with first-brood nauplii released by females injected with either *ArHsp40* or *ArHsp40-2* dsRNA (Fig. 4A–C).

#### ***Artemia franciscana* cysts deficient in ArHsp40 but not ArHsp40-2 abort diapause entry**

Rather than entering diapause upon incubation in seawater, cysts deficient in ArHsp40 began hatching by 2 days post-release and after 5 days, 47% of cysts had hatched and released swimming nauplii (Fig. 5). No further hatching was observed up to 10 days post-release. The resulting nauplii were morphologically normal and they reached sexual maturity. None of the cysts released from females receiving either *ArHsp40-2* or *GFP* dsRNA hatched by 10 days nor was there any hatching of these cysts after 120 days, at which time observations ceased.

#### **Knockdown of ArHsp40 and ArHsp40-2 reduces the stress tolerance of *A. franciscana* cysts and nauplii**

After release from females, knockdown cysts were incubated in seawater for 10 days at room temperature, dried, stored frozen and

then incubated in seawater to determine hatching success, the indicator of viability. Fifty-seven per cent of cysts from females receiving *GFP* dsRNA, and thus possessing both ArHsp40 and ArHsp40-2, hatched. By comparison, 21% of cysts lacking ArHsp40 and 38% lacking ArHsp40-2 hatched (Fig. 6A). Eighty-nine per cent of nauplii released from *A. franciscana* females receiving *GFP* dsRNA survived heat shock at 39°C for 1 h and recovery for 24 h, whereas 45% and 67% of nauplii from females injected, respectively, with *ArHsp40* and *ArHsp40-2* dsRNA were alive after the recovery period (Fig. 6B).

#### **Longevity of *A. franciscana* nauplii deficient in ArHsp40 and ArHsp40-2**

At 3 weeks post-release, 97% of nauplii from females injected with *GFP* dsRNA survived whereas 53% and 81% of nauplii deficient in ArHsp40 and ArHsp40-2, respectively, survived (Fig. 7). Five weeks after release, when *A. franciscana* reached sexual maturity, 76% of the animals from females injected with *GFP* dsRNA were alive. In contrast, no animals lacking ArHsp40 survived for 5 weeks post-release and 53% of animals deficient in ArHsp40-2 were viable. Only 2.3% of nauplii hatching from cysts that aborted diapause survived for 3 weeks and in 4 weeks all of these nauplii were dead. All animals were dead 8 weeks after release (Fig. 7).

#### **DISCUSSION**

*Artemia franciscana* females were injected with dsRNA complementary to J-domain proteins in order to study their function in active larvae as well as in diapause-destined embryos and diapausing cysts. PCR primers were designed to amplify either the ZBD of ArHsp40, which is lacking in ArHsp40-2, or the variable G/F rich-substrate-binding region of ArHsp40-2. *ArHsp40* dsRNA knocked down ArHsp40 and its mRNA but had no apparent effect on ArHsp40-2, nor did injection with *ArHsp40-2* dsRNA reduce ArHsp40. Protein extracts of cysts and nauplii from females injected with *GFP* dsRNA, used as a control, contained ArHsp40 and ArHsp40-2. *GFP* dsRNA was not expected to affect *A. franciscana* because the organism does not synthesize GFP (Zhao et al., 2012). RNAi was employed previously to examine sHsps, artemin and late embryonic abundant (LEA) proteins in developing embryos, cysts and nauplii of *A. franciscana* (King and MacRae, 2012; King et al., 2013, 2014; Toxopeus et al., 2014), and its use in this work was equally successful.

Injection with *ArHsp40* and *ArHsp40-2* dsRNA did not decrease the survival of adult *A. franciscana* females although, in a previous

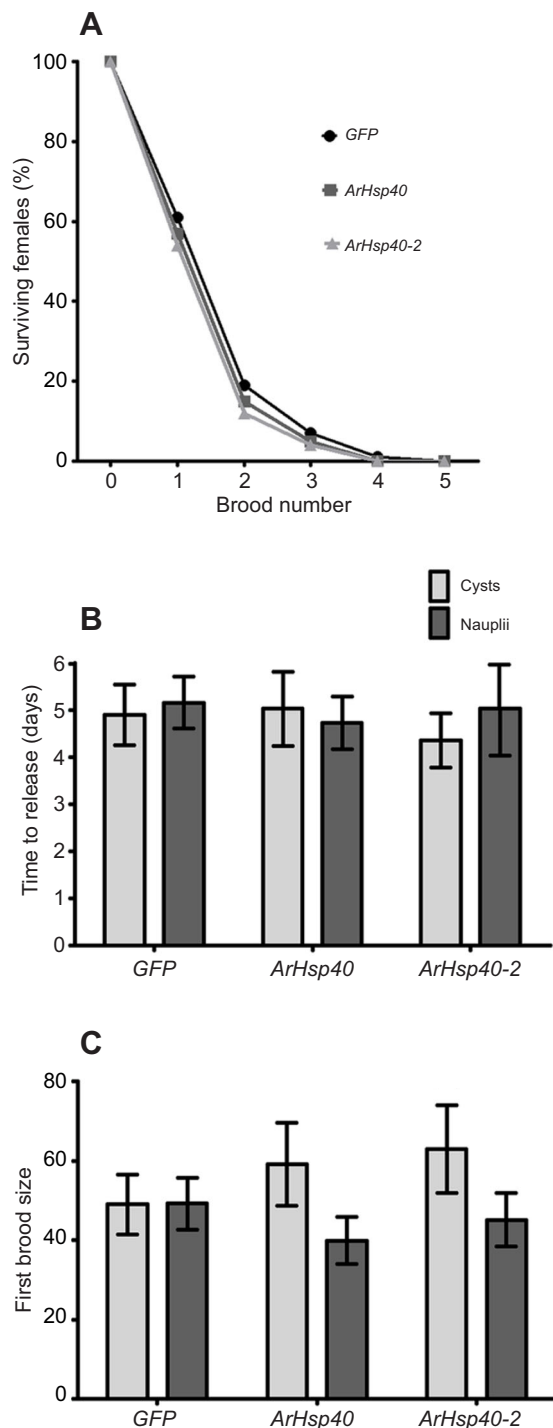

**Fig. 2. dsRNAs affect neither survival of *A. franciscana* females nor embryo development.** (A) Survival of *A. franciscana* females injected with GFP, ArHsp40 or ArHsp40-2 dsRNA after successive brood releases. Forty-two animals were examined for GFP dsRNA, 42 for ArHsp40 and 41 for ArHsp40-2. (B) Mean time from fertilization to release of first-brood cysts and nauplii for females injected with GFP, ArHsp40 or ArHsp40-2 dsRNA. (C) Mean size of first broods (number of offspring) released by females injected with GFP, ArHsp40 or ArHsp40-2 dsRNA. Data in B and C are means  $\pm$  s.e.m. of  $n=12$  replicates per experiment; one-way ANOVA, Dunnett's test ( $P \geq 0.05$ ).

study, injection of dsRNA for the sHsp ArHsp22, which is stress inducible in adults, killed females (King, 2013). The results indicate that ArHsp40 and ArHsp40-2 were not knocked down in adults by

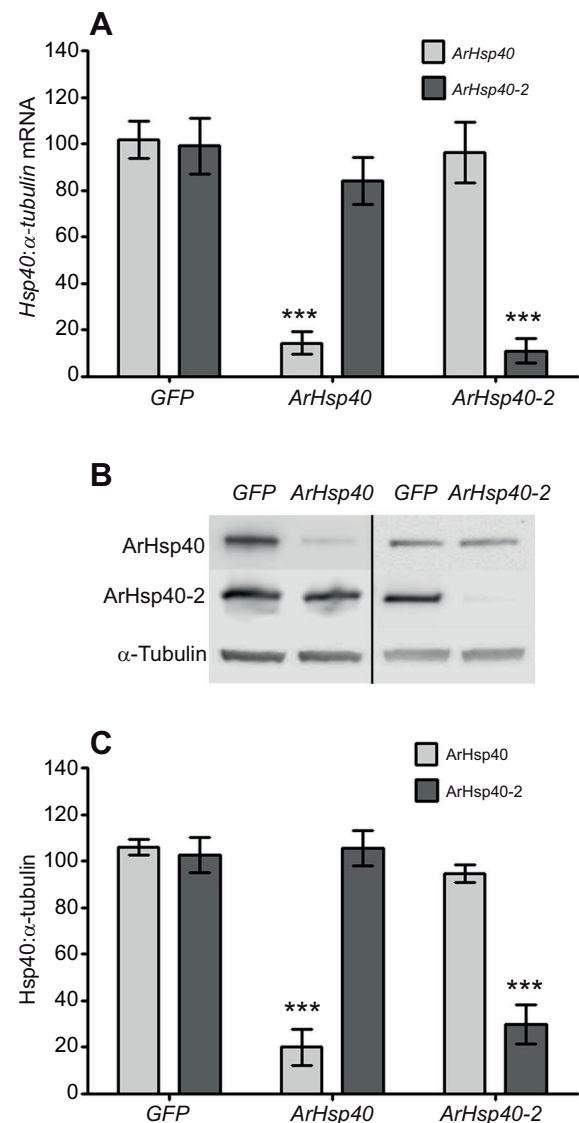

**Fig. 3. Knockdown of ArHsp40 and ArHsp40-2 in *A. franciscana* cysts.** (A) RNA recovered from cysts released by females injected with GFP, ArHsp40 or ArHsp40-2 dsRNA was reverse transcribed; the amount of ArHsp40 and ArHsp40-2 mRNA in each was determined by qPCR and normalized to  $\alpha$ -tubulin mRNA levels. The experiment was performed in duplicate. (B) Protein extracts of cysts 10 days post-release from females injected with GFP, ArHsp40 or ArHsp40-2 dsRNA were analysed by western blotting with antibodies specific for ArHsp40, ArHsp40-2 and tyrosinated  $\alpha$ -tubulin. The experiment was performed in triplicate. (C) Antibody-reactive proteins were quantified and the ratios of ArHsp40 and ArHsp40-2 to tyrosinated  $\alpha$ -tubulin were calculated. Data in A and C are means  $\pm$  s.e.m. of  $n=3$  replicates per experiment; one-way ANOVA, Dunnett's test; asterisks indicate a significant difference from values for GFP ( $***P < 0.005$ ).

the injection of dsRNA for either protein even though they were in offspring or, if these proteins were reduced, then they were not required for the survival of adult *A. franciscana*. Additionally, the time to release and the brood size of cysts and nauplii were unaffected by ArHsp40 and ArHsp40-2 dsRNAs, indicating that embryo development and release were normal even though ArHsp40 and ArHsp40-2 may have been reduced or absent. This contrasts with the situation for the sHsp p26, the loss of which increases the time to release of cysts (King and MacRae, 2012), and the knockdown of artemin, which increases the time for complete brood release in *A. franciscana* (King et al., 2014).

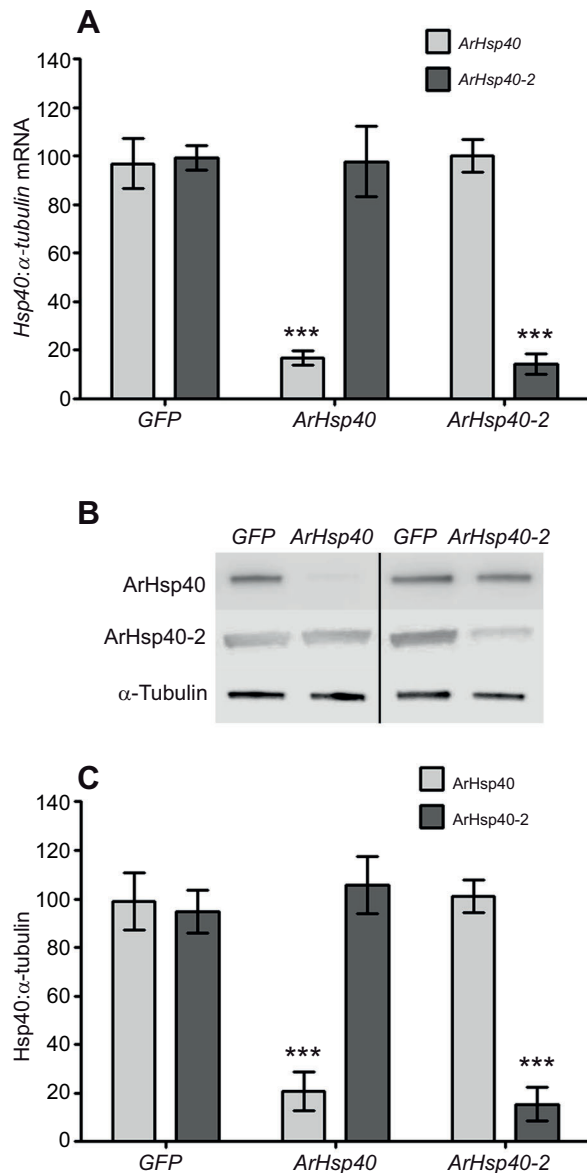

**Fig. 4. Knockdown of ArHsp40 and ArHsp40-2 in *A. franciscana* nauplii.** (A) RNA extracted from first-brood nauplii collected immediately after release from females injected with *GFP*, *ArHsp40* or *ArHsp40-2* dsRNA was reverse transcribed; the amount of *ArHsp40* and *ArHsp40-2* mRNA in each was determined by qPCR and normalized to  $\alpha$ -tubulin mRNA levels. The experiment was performed in duplicate. (B) Protein extracts prepared from nauplii immediately after release from females injected with *GFP*, *ArHsp40* dsRNA or *ArHsp40-2* dsRNA were analysed by western blotting with antibodies specific for ArHsp40, ArHsp40-2 and tyrosinated  $\alpha$ -tubulin. The experiment was performed in triplicate. (C) Antibody-reactive proteins were quantified and the ratios of ArHsp40 and ArHsp40-2 to tyrosinated  $\alpha$ -tubulin were calculated. Data in A and C are means  $\pm$  s.e.m. of  $n=3$  replicates per experiment; one-way ANOVA, Dunnett's test; asterisks indicate a significant difference from values for *GFP* injection (\*\*\* $P<0.005$ ).

By 10 days post-release from females, 47% of ArHsp40 knockdown cysts hatched, yielding morphologically normal nauplii that developed into sexually mature animals, whereas no cysts with either normal amounts of ArHsp40 and ArHsp40-2 (injected with *GFP* dsRNA) or reduced ArHsp40-2 hatched. Cysts that did not hatch had either entered diapause or died. By comparison, the knockdown of the stress-induced transcription factor p8 by RNAi causes approximately 50% of *A. franciscana* cysts to hatch prematurely by

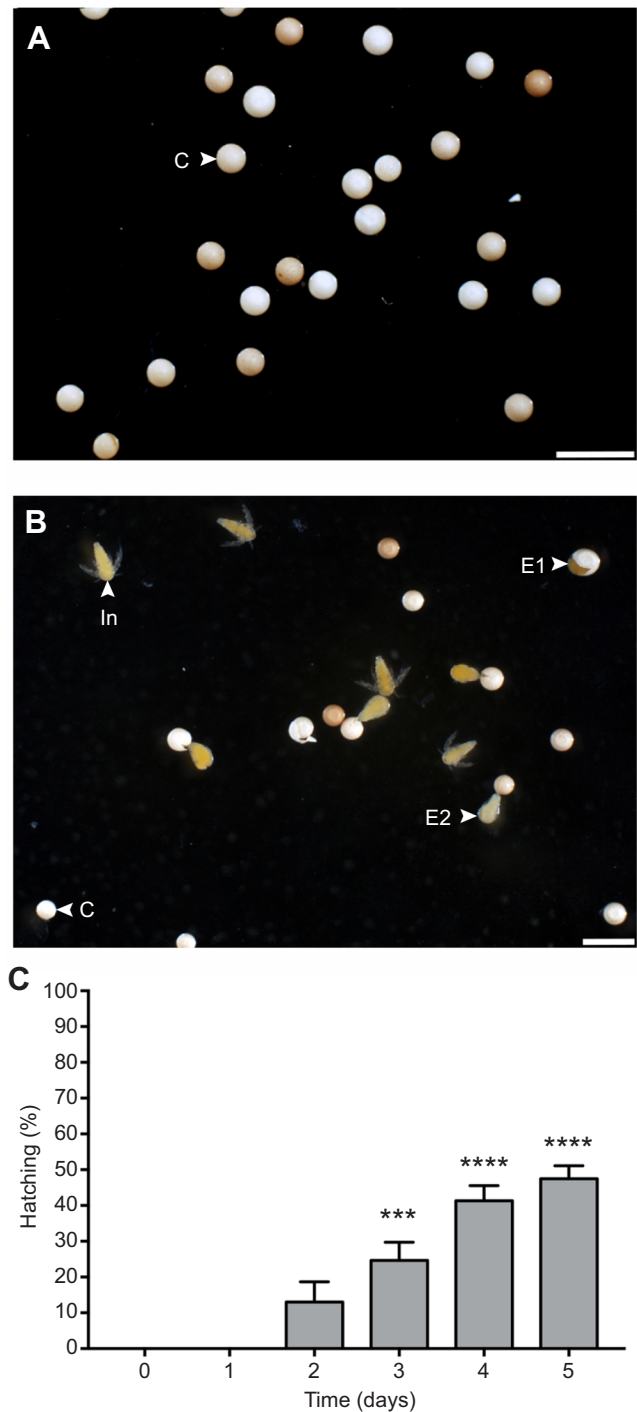

**Fig. 5. *Artemia franciscana* cysts with reduced ArHsp40 abort diapause entry.** Light micrographs of cysts from females injected with *ArHsp40* dsRNA 1 day (A) and 3 days (B) post-release. C, cysts; E1, emerged nauplius 1; E2, emerged nauplius 2; In, first instar nauplius. (C) The number of first-brood cysts that hatched (aborted diapause) is expressed as a percentage of the total number of cysts released. Data are means  $\pm$  s.e.m. of  $n=6$  replicates per experiment; one-way ANOVA, Dunnett's test; asterisks indicate a significant difference from values for 0 days post-release (\*\*\* $P<0.005$ ; \*\*\*\* $P<0.001$ ).

36 h after release from females (King, 2013). p8 is developmentally regulated in *Artemia* embryos and progressively accumulates in the nuclei of encysted embryos (Qiu and MacRae, 2007; Lin et al., 2016). ArHsp40 may assist in the translocation of p8 or other transcription factors into nuclei, thereby promoting transcription of genes that

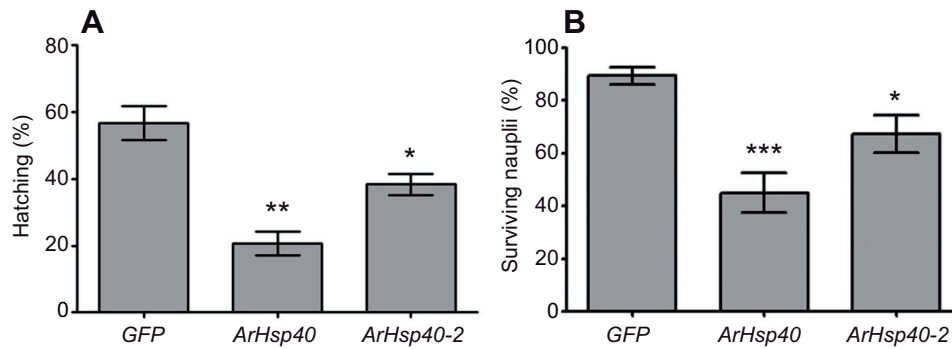

**Fig. 6. ArHsp40 and ArHsp40-2 contribute to the stress tolerance of *A. franciscana* cysts and nauplii.** (A) First-brood cysts obtained from *A. franciscana* females injected with *GFP*, *ArHsp40* or *ArHsp40-2* dsRNA were incubated in seawater at room temperature after desiccation and freezing; the number of resulting nauplii is expressed as a percentage of the initial number of cysts. The results were averaged ( $n=6$ ) for each dsRNA. (B) Newly released first-brood nauplii from females injected with *GFP*, *ArHsp40* or *ArHsp40-2* dsRNA were heat shocked at 39°C for 1 h and then incubated for 24 h at 27°C; the number of swimming nauplii post-recovery is expressed as a percentage of the initial number of cysts as a measure of viability. Data are means  $\pm$  s.e.m. of  $n=6$  (A) and  $n=3$  (B) replicates per experiment; one-way ANOVA, Dunnett's test; asterisks indicate a significant difference from values for *GFP* injection (\* $P<0.05$ ; \*\* $P<0.01$ ; \*\*\* $P<0.005$ ).

arrest the cell cycle and depress metabolism, as occurs during diapause. Conversely, transcription factors depending on ArHsp40 for transport into nuclei may inhibit expression of genes that support cell cycle progression and metabolism. Thus, in the absence of ArHsp40, cells remain active and entry into diapause is inhibited. The knockdown of ArHsp40-2 did not affect diapause entry, implying that this J-domain protein does not interact with proteins that promote diapause entry. Cysts with reduced ArHsp40 that did not hatch within the first 10 days post-release from females remained dormant for 180 days in seawater at room temperature. This result contrasts with the knockdown of p26, which results in almost 90% of cysts hatching spontaneously after 90 days in seawater at room temperature (King and MacRae, 2012).

MicroRNAs (miRNAs) modulate diapause in insects and crustaceans. Diapausing pupae of the flesh fly *Sarcophaga bullata* downregulate several miRNAs, some of which shape lipid metabolism and increase the synthesis of Hsps that protect against stress (Reynolds et al., 2013, 2017). The knockdown of the miRNAs miR-100 and miR-34 in *Artemia parthenogenetica* inhibits cell cycle arrest during diapause entry by downregulating polo-like kinase 1 and activating cyclin K and RNA polymerase II (Zhao

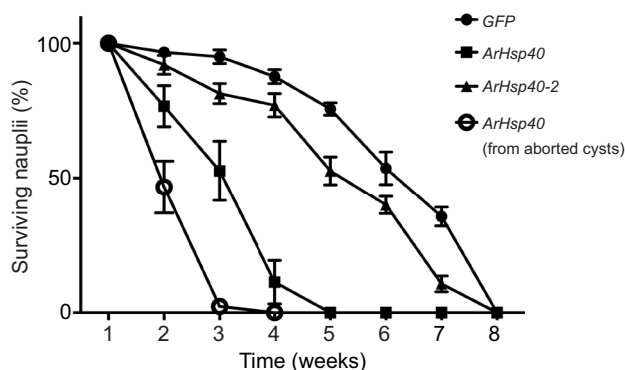

**Fig. 7. Knockdown of ArHsp40 and ArHsp40-2 reduces the longevity of *A. franciscana* nauplii.** Newly released first-brood nauplii from females injected with *GFP*, *ArHsp40* or *ArHsp40-2* dsRNA and nauplii prematurely hatched from cysts released by females injected with *ArHsp40* dsRNA were incubated at 27°C and swimming nauplii were counted weekly for 8 weeks as a measure of viability. The number of surviving nauplii at each time point is given as a percentage of the initial number of nauplii. Data are means  $\pm$  s.e.m. of  $n=3$  replicates.

et al., 2015). In another example, the reduction of p90 ribosomal S6 kinase 2 mRNA by RNAi in *A. franciscana* and *A. parthenogenetica* embryos causes cell cycle arrest to fail, resulting in the production of pseudo-diapause cysts that develop within their shells (Zhao et al., 2015; Dai et al., 2008). The molecular pathways and signalling factors that regulate diapause entry remain uncertain but J-domain proteins, among other factors, play a role in this process.

Prolonged desiccation and freezing are required to terminate diapause in *A. franciscana* cysts from the Great Salt Lake and this causes water loss and reactive oxygen species accumulation, which leads to the denaturation and aggregation of proteins (Toxopeus et al., 2014). After desiccation and freezing, approximately 20% and 40% of cysts, respectively, with reduced ArHsp40 and ArHsp40-2, hatched. By comparison, 6% of cysts with reduced p26 hatch under similar conditions (King and MacRae, 2012) and 5% of cysts with reduced amounts of group 1 LEA proteins survive (Toxopeus et al., 2014). These molecular chaperones, along with ArHsp40 and ArHsp40-2, are likely to work cooperatively to promote protein homeostasis and stress tolerance during diapause. ArHsp40 and ArHsp40-2 may function as part of the Hsp110–Hsp70–Hsp40 protein disaggregase system (Nilleghoda et al., 2015, 2017, 2018; Kaimal et al., 2017; Kityk et al., 2018), rescuing proteins from aggregates and refolding them, which is likely to be especially important as post-diapause development occurs. The J-domain proteins may be required, in concert with Hsp70 and other molecular chaperones, to extract proteins from p26, an abundant sHsp in diapausing cysts that is thought to bind partially denatured proteins and protect them from irreversible denaturation (Liang et al., 1997a,b; Sun et al., 2006; King and MacRae, 2012). It is also possible that, during diapause, ATP is limiting and J-domain proteins sequester proteins required for embryo development after diapause termination. Cysts without ArHsp40 and ArHsp40-2 may not sequester proteins as efficiently as when these proteins are present and consequently they experience higher mortality during diapause.

J-domain proteins transport substrates to Hsp70 for protection during stress, which provides tolerance to heat, desiccation and oxidation (Cyr and Ramos, 2015; Glover and Lindquist, 1998). Newly released nauplii deficient in either ArHsp40 or ArHsp40-2 exhibited reduced stress tolerance as compared with nauplii from females injected with *GFP* dsRNA, with loss of ArHsp40 having a greater effect. Based on the lower survival upon knockdown, ArHsp40 may either enhance protein refolding by Hsp70 more

effectively than does ArHsp40-2 or react with protein substrates more vital to growth.

ArHsp40 is more important for the longevity of nauplii than is ArHsp40-2, although both J-domain proteins are required for maximum longevity. Interestingly, this is apparently not true for adults because injection of dsRNA for both J-domain proteins had no effect on adult life span. Moreover, nauplii arising from cysts upon abortion of diapause entry live shorter lives than do nauplii arising directly from females, even if the females have been injected with dsRNA for either ArHsp40 or ArHsp40-2. Why ArHsp40 and ArHsp40-2 have divergent effects on longevity in larvae and adults and on larvae from different sources is unknown but may reflect interaction with dissimilar substrates at diverse life history stages or variation in the need for J-domain proteins for the folding of other proteins as organisms develop.

### Conclusions

ArHsp40, a type 1 J-domain protein, and ArHsp40-2, a type 2 J-domain protein, were knocked down in *A. franciscana* cysts and nauplii by RNAi. The reduction of these J-domain proteins had no apparent effect on adult females of *A. franciscana*. Some cysts lacking ArHsp40, but not ArHsp40-2, aborted diapause entry and hatched, yielding nauplii that were morphologically normal but with reduced longevity. ArHsp40 may assist in the folding or intracellular transport of proteins required for transcription and other processes involved in diapause entry. Cysts and nauplii with reduced ArHsp40 and ArHsp40-2 exhibited lower stress tolerance, with loss of the former more damaging than loss of the latter. J-domain proteins promote protein folding and in cooperation with Hsp70 they rescue damaged proteins, which may explain their role in stress tolerance. Interestingly, injection of females with *ArHsp40* and *ArHsp40-2* dsRNA did not lessen the longevity of the adults but did reduce the longevity of the larvae they produced, with larvae arising from cysts that aborted diapause entry being more severely affected than larvae arising directly from females. The results presented herein advance our appreciation of J-domain protein function during stress tolerance and demonstrate previously unrecognized roles for molecular chaperones in diapause entry and larvae longevity.

### Competing interests

The authors declare no competing or financial interests.

### Author contributions

Conceptualization: N.M.R., T.H.M.; Methodology: N.M.R., T.H.M.; Software: N.M.R.; Validation: N.M.R., T.H.M.; Formal analysis: N.M.R., T.H.M.; Investigation: N.M.R.; Resources: T.H.M.; Data curation: N.M.R.; Writing - original draft: N.M.R., T.H.M.; Writing - review & editing: N.M.R., T.H.M.; Visualization: N.M.R., T.H.M.; Supervision: T.H.M.; Project administration: T.H.M.; Funding acquisition: T.H.M.

### Funding

This research was supported by the Natural Sciences and Engineering Research Council of Canada, grant number RGPIN/04882-2016.

### References

Arezo, M. J., Papa, N. G., Berois, N., Clivio, G., Montagne, J. and De la Piedra, S. (2017). Annual killifish adaptations to ephemeral environments: diapause I in two *Austrolebias* species. *Develop. Dynam.* **246**, 848-857.

Bascos, N. A. D., Mayer, M. P., Bukau, B. and Landry, S. J. (2017). The Hsp40 J-domain modulates Hsp70 conformation and ATPase activity with a semi-elliptical spring. *Prot. Sci.* **26**, 1838-1851.

Clark, M. S., Denekamp, N. Y., Thorne, M. A. S., Reinhardt, R., Drungowski, M., Albrecht, M. W., Klages, S., Beck, A., Kube, M. and Lubzens, E. (2012). Long-term survival of hydrated resting eggs from *Brachionus plicatilis*. *PLoS ONE* **7**, e29365.

Clegg, J. S. (1997). Embryos of *Artemia franciscana* survive four years of continuous anoxia: the case for complete metabolic rate depression. *J. Exp. Biol.* **200**, 467-475.

Clegg, J. S. (2005). Desiccation tolerance in encysted embryos of the animal extremophile, *Artemia*. *Integr. Comp. Biol.* **45**, 715-724.

Clegg, J. S. (2011). Stress-related proteins compared in diapause and in activated, anoxic encysted embryos of the animal extremophile, *Artemia franciscana*. *J. Insect Physiol.* **57**, 660-664.

Clegg, J. S., Drinkwater, L. E. and Sorgeloos, P. (1996). The metabolic status of diapause embryos of *Artemia franciscana* (SFB). *Physiol. Zool.* **69**, 49-66.

Clegg, J. S., Jackson, S. A. and Popov, V. I. (2000). Long-term anoxia in encysted embryos of the crustacean, *Artemia franciscana*: viability, ultrastructure, and stress proteins. *Cell Tissue Res.* **301**, 433-446.

Craig, E. A. and Marszalek, J. (2017). How do J-proteins get Hsp70 to do so many different things? *Trend. Biochem. Sci.* **42**, 355-368.

Cyr, D. M. and Ramos, C. H. (2015). Specification of Hsp70 function by type I and type II Hsp40. *SubCell. Biochem.* **78**, 91-102.

Dai, J.-Q., Zhu, X.-J., Liu, F.-Q., Xiang, J.-H., Nagasawa, H. and Yang, W.-J. (2008). Involvement of p90 ribosomal S6 kinase in termination of cell cycle arrest during development of *Artemia*-encysted embryos. *J. Biol. Chem.* **283**, 1705-1712.

Dai, L., Chen, D.-F., Liu, Y.-L., Zhao, Y., Yang, F., Yang, J.-S. and Yang, W.-J. (2011). Extracellular matrix proteins of *Artemia* cyst shell participate in protecting encysted embryos from extreme environments. *PLoS ONE* **6**, e20187.

Denlinger, D. L. (2002). Regulation of diapause. *Ann. Rev. Entomol.* **47**, 93-122.

Denlinger, D. L. and Armbruster, P. A. (2014). Mosquito diapause. *Ann. Rev. Entomol.* **59**, 73-93.

Glover, J. R. and Lindquist, S. (1998). Hsp104, Hsp70, and Hsp40: A novel chaperone system that rescues previously aggregated proteins. *Cell* **94**, 73-82.

Hahn, D. A. and Denlinger, D. L. (2007). Meeting the energetic demands of insect diapause: Nutrient storage and utilization. *J. Insect Physiol.* **53**, 760-773.

Hand, S. C., Patil, Y., Li, S., Chakraborty, N., Borcar, A., Menze, M. A., Boswell, L. C., Moore, D. and Toner, M. (2013). Diapause and anhydrobiosis in embryos of *Artemia franciscana*: metabolic depression, LEA proteins and water stress. *Cryobiol. Cryotechnol.* **59**, 41-46.

Hayward, S. A. L., Pavlides, S. C., Tammariello, S. P., Rinehart, J. P. and Denlinger, D. L. (2005). Temporal expression patterns of diapause-associated genes in flesh fly pupae from the onset of diapause through post-diapause quiescence. *J. Insect Physiol.* **51**, 631-640.

Iryani, M. T. M., MacRae, T. H., Panchakshari, S., Tan, J., Bossier, P., Wahid, M. E. A. and Sung, Y. Y. (2017). Knockdown of heat shock protein 70 (Hsp70) by RNAi reduces the tolerance of *Artemia franciscana* nauplii to heat and bacteria. *J. Exp. Mar. Biol. Ecol.* **487**, 106-112.

Jackson, S. A. and Clegg, J. S. (1996). Ontogeny of low molecular weight stress protein p26 during early development of the brine shrimp, *Artemia franciscana*. *Develop. Growth Differ.* **38**, 153-160.

Janis, B., Uversky, V. N. and Menze, M. A. (2017). Potential functions of LEA proteins from the brine shrimp *Artemia franciscana*—anhydrobiosis meets bioinformatics. *J. Biomol. Struct. Dynamic.*

Jiang, G., Rowarth, N. M., Panchakshari, S. and MacRae, T. H. (2016). ArHsp40, a type 1 J-domain protein, is developmentally regulated and stress inducible in post-diapause *Artemia franciscana*. *Cell Stress Chaperones* **21**, 1077-1088.

Kaimal, J. M., Kandasamy, G., Gasser, F. and Andréasson, C. (2017). Coordinated Hsp110 and Hsp104 activities power protein disaggregation in *Saccharomyces cerevisiae*. *Mol. Cell. Biol.* **37**, e00027-e00017.

King, A. M. (2013). Elucidating the functions of proteins up-regulated during diapause in *Artemia franciscana* using RNAi. *PhD thesis*, Dalhousie University, Halifax, NS.

King, A. M. and MacRae, T. H. (2012). The small heat shock protein p26 aids development of encysting *Artemia* embryos, prevents spontaneous diapause termination and protects against stress. *PLoS ONE* **7**, e43723.

King, A. M. and MacRae, T. H. (2015). Insect heat shock proteins during stress and diapause. *Annu. Rev. Entomol.* **60**, 59-75.

King, A. M., Toxopeus, J. and MacRae, T. H. (2013). Functional differentiation of small heat shock proteins in diapause-destined *Artemia* embryos. *FEBS J.* **280**, 4761-4772.

King, A. M., Toxopeus, J. and MacRae, T. H. (2014). Artemin, a diapause-specific chaperone, contributes to the stress tolerance of *Artemia franciscana* cysts and influences their release from females. *J. Exp. Biol.* **217**, 1719-1724.

Kityk, R., Kopp, J. and Mayer, M. P. (2018). Molecular mechanism of J-domain-triggered ATP hydrolysis by Hsp70 chaperones. *Mol. Cell* **69**, 227-237.

Košťál, V. (2006). Eco-physiological phases of insect diapause. *J. Insect Physiol.* **52**, 113-127.

Košťál, V., Štětina, T., Poupardin, R., Korbelová, J. and Bruce, A. W. (2017). Conceptual framework of the eco-physiological phases of insect diapause development justified by transcriptomic profiling. *Proc. Natl. Acad. Sci. USA* **114**, 8532-8537.

Liang, P. and MacRae, T. H. (1999). The synthesis of a small heat shock/ $\alpha$ -crystallin protein in *Artemia* and its relationship to stress tolerance during development. *Develop. Biol.* **207**, 445-456.

Liang, P., Amons, R., Clegg, J. S. and MacRae, T. H. (1997a). Molecular characterization of a small heat shock/ $\alpha$ -crystallin protein in encysted *Artemia* embryos. *J. Biol. Chem.* **272**, 19051-19058.



- Liang, P., Amons, R., MacRae, T. H. and Clegg, J. S. (1997b). Purification, structure and *in vitro* molecular-chaperone activity of *Artemia* p26, a small heat-shock/ $\alpha$ -crystallin protein. *Eur. J. Biochem.* **243**, 225-232.
- Lin, C., Jia, S.-N., Yang, F., Jia, W.-H., Yu, X.-J., Yang, J.-S. and Yang, W.-J. (2016). The transcription factor p8 regulates autophagy during diapause embryo formation in *Artemia parthenogenetica*. *Cell Stress Chaperones* **21**, 665-675.
- Liu, Y.-L., Zhao, Y., Dai, Z.-M., Chen, H.-M. and Yang, W.-J. (2009). Formation of diapause cyst shell in brine shrimp, *Artemia parthenogenetica*, and its resistance role in environmental stresses. *J. Biol. Chem.* **284**, 16931-16938.
- Ma, W.-M., Li, H.-W., Dai, Z.-M., Yang, J.-S., Yang, F. and Yang, W.-J. (2013). Chitin-binding proteins of *Artemia* diapause cysts participate in formation of the embryonic cuticle layer of cyst shells. *Biochem. J.* **449**, 285-294.
- MacRae, T. H. (2003). Molecular chaperones, stress resistance and development in *Artemia franciscana*. *Sem. Cell Dev. Biol.* **14**, 251-258.
- MacRae, T. H. (2010). Gene expression, metabolic regulation and stress tolerance during diapause. *Cell. Mol. Life Sci.* **67**, 2405-2424.
- MacRae, T. H. (2016). Stress tolerance during diapause and quiescence of the brine shrimp, *Artemia*. *Cell Stress Chaperones* **21**, 9-18.
- Mayer, M. P. (2018). Intra-molecular pathways of allosteric control in Hsp70s. *Phil. Trans. R. Soc. B.* **373**, 20170183.
- Mayer, M. P. and Bukau, B. (2005). Hsp70 chaperones: cellular functions and molecular mechanism. *Cell. Mol. Life Sci.* **62**, 670-684.
- Nillegoda, N. B., Kirstein, J., Szlachcic, A., Berynsky, M., Stank, A., Stengel, F., Arnsburg, K., Gao, X., Scior, A., Aebersold, R. et al. (2015). Crucial HSP70 co-chaperone complex unlocks metazoan protein disaggregation. *Nature* **524**, 247-251.
- Nillegoda, N. B., Stank, A., Malinverni, D., Alberts, N., Szlachcic, A., Barducci, A., De Los Rios, P., Wade, R. C. and Bukau, S. (2017). Evolution of an intricate J-protein network driving protein disaggregation in eukaryotes. *eLIFE* **6**, e24560.
- Nillegoda, N. B., Wentink, A. S. and Bukau, B. (2018). Protein disaggregation in multicellular organisms. *Trend. Biochem. Sci.* **43**, 285-300.
- Qiu, Z. and MacRae, T. H. (2007). Developmentally regulated synthesis of p8, a stress-associated transcription cofactor, in diapause-destined embryos of *Artemia franciscana*. *Cell Stress Chaperones* **12**, 255-264.
- Reynolds, J. A., Clark, J., Diakoff, S. J. and Denlinger, D. L. (2013). Transcriptional evidence for small RNA regulation of pupal diapause in the flesh fly, *Sarcophaga bullata*. *Insect Biochem. Mol. Biol.* **43**, 982-989.
- Reynolds, J. A., Peyton, J. T. and Denlinger, D. L. (2017). Changes in microRNA abundance may regulate diapause in the flesh fly, *Sarcophaga bullata*. *Insect Biochem. Mol. Biol.* **84**, 1-14.
- Robbins, H. M., Van Stappen, G., Sorgeloos, P., Sung, Y. Y., MacRae, T. H. and Bossier, P. (2010). Diapause termination and development of encysted *Artemia* embryos: roles for nitric oxide and hydrogen peroxide. *J. Exp. Biol.* **213**, 1464-1470.
- Romney, A. L. and Podrabsky, J. E. (2017). Transcriptomic analysis of maternally provisioned cues for phenotypic plasticity in the annual killifish, *Austrofundulus limnaeus*. *EvoDevo* **8**, 6.
- Rowarth, N. M. and MacRae, T. H. (2018). Post-diapause synthesis of ArHsp40-2, a type 2 J-domain protein from *Artemia franciscana*, is developmentally regulated and induced by stress. *PLoS ONE* **13**, e0201477.
- Sun, Y., Bojkova-Fournier, S. and MacRae, T. H. (2006). Structural and functional roles for  $\beta$ -strand 7 in the  $\alpha$ -crystallin domain of p26, a polydisperse small heat shock protein from *Artemia franciscana*. *FEBS J.* **273**, 1020-1034.
- Tachibana, S.-I. and Numata, H. (2004). Effects of temperature and photoperiod on the termination of larval diapause in *Lucilia sericata* (Diptera: Calliphoridae). *Zool. Sci.* **21**, 197-202.
- Tarrant, A. M., Baumgartner, M. F., Hansen, B. H., Altin, D., Nordtug, T. and Olsen, A. J. (2014). Transcriptional profiling of reproductive development, lipid storage and molting throughout the last juvenile stage of the marine copepod *Calanus finmarchicus*. *Front. Zool.* **11**, 91.
- Tarrant, A. M., Baumgartner, M. F., Lysiak, N. S. J., Altin, D., Størseth, T. R. and Hansen, B. H. (2016). Transcriptional profiling of metabolic transitions during development and diapause preparation in the copepod *Calanus finmarchicus*. *Integ. Comp. Biol.* **56**, 1157-1169.
- Terao, M., Hirose, Y. and Shintani, Y. (2012). Effects of temperature and photoperiod on termination of pseudopupal diapause in the bean blister beetle, *Epicauta gorhami*. *J. Insect Physiol.* **58**, 737-742.
- Toxopeus, J., Warner, A. H. and MacRae, T. H. (2014). Group 1 LEA proteins contribute to the desiccation and freeze tolerance of *Artemia franciscana* embryos during diapause. *Cell Stress Chaperones* **19**, 939-948.
- Xiang, H. and MacRae, T. H. (1995). Production and utilization of deetyrosinated tubulin in developing *Artemia* larvae: evidence for  $\alpha$  tubulin-reactive carboxypeptidase. *Biochem. Cell Biol.* **73**, 673-685.
- Yocum, G. D., Rinehart, J. P. and Larson, M. L. (2009). Down-regulation of gene expression between the diapause initiation and maintenance phases of the Colorado potato beetle, *Leptinotarsa decemlineata* (Coleoptera: Chrysomelidae). *Eur. J. Entomol.* **106**, 471-476.
- Zhao, Y., Ding, X., Ye, X., Dai, Z.-M., Yang, J.-S. and Yang, W.-J. (2012). Involvement of cyclin K posttranscriptional regulation in the formation of *Artemia* diapause cysts. *PLoS ONE* **7**, e32129.
- Zhao, L.-L., Jin, F., Ye, X., Zhu, L., Yang, J.-S. and Yang, W.-J. (2015). Expression profiles of miRNAs and involvement of miR-100 and miR-34 in regulation of cell cycle arrest in *Artemia*. *Biochem. J.* **470**, 223-231.
- Zuiderweg, E. R. P., Hightower, L. E. and Gestwicki, J. E. (2017). The remarkable multivalency of the Hsp70 chaperones. *Cell Stress Chaperones* **22**, 173-189.
- Żwirowski, S., Kłosowska, A., Obuchowski, I., Nillegoda, N. B., Piróg, A., Ziętkiewicz, S., Bukau, B., Mogk, A. and Liberek, K. (2017). Hsp70 displaces small heat shock proteins from aggregates to initiate protein refolding. *EMBO J.* **36**, 783-796.
